# Supplementary material for: Impact of Counseling Methods on HIV Retesting Uptake in At-Risk Individuals: A Randomized Controlled Study
Source: Springer Nature journal article supplement (doi:10.1007/s10461-019-02695-2), 2019-10-11
Supplement: MOESM1 [file 17264694]

Supplementary Table I: Number of participants who presented for HIV retesting within 7 months by sex at birth (final analysis)

|  | **Standard counseling** |  |  | **Computer-assisted counseling** |  |
| --- | --- | --- | --- | --- | --- |
|  | **Males**  **(N=292)** | **Females**  **(N=238)** |  | **Males**  **(N=265)** | **Females**  **(N=241)** |
|  |  |  |  |  |  |
| No. of participants who presented for HIV retesting within 7 months | 44 | 17 |  | 42 | 21 |
|  |  |  |  |  |  |
| Proportion of participants who presented for HIV retesting within 7 monthsa | 15.1%  (95% CI:  11.2% to 19.7%) | 7.1%  (95% CI:  4.2% to 11.2%) |  | 15.8%  (95% CI:  11.7% to 20.8%) | 8.7%  (95% CI:  5.5% to 13.0%) |
|  |  |  |  |  |  |

a Confidence intervals based on the exact binomial distribution.

Supplementary Table II: Secondary endpoints by counseling arm and sex at birth (final analysis)

|  | **Standard counseling** |  |  | **Computer-assisted counseling** |  |
| --- | --- | --- | --- | --- | --- |
|  | **Males** | **Females** |  | **Males** | **Females** |
|  |  |  |  |  |  |
| **Data in all participants** | **N=292** | **N=238** |  | **N=265** | **N=241** |
|  |  |  |  |  |  |
| Median (interquartile range) time spent by participants during the counseling session, in minutes | 14 (11 to 17) (n=291) | 15 (12 to 18) |  | 11 (8 to 16) | 12 (9 to 17) (n=240) |
|  |  |  |  |  |  |
| Median (interquartile range) time spent by counselors during the counseling session, in minutes | 14 (11 to 17) (n=291) | 15 (12 to 18) |  | 4 (2 to 7) | 4 (2 to 7) |
|  |  |  |  |  |  |
| Satisfaction with the counseling method |  |  |  |  |  |
| Very satisfied | 260/288 (90%) | 213/234 (91%) |  | 222/256 (87%) | 213/236 (90%) |
| Satisfied | 28/288 (10%) | 20/234 (9%) |  | 33/256 (13%) | 22/236 (9%) |
| Dissatisfied | 0/288 (0%) | 0/234 (0%) |  | 1/256 (<1%) | 1/236 (<1%) |
| Very dissatisfied | 0/288 (0%) | 1/234 (<1%) |  | 0/256 (0%) | 0/236 (0%) |
|  |  |  |  |  |  |
| Understanding of HIV transmission routes |  |  |  |  |  |
| Urine (False) |  |  |  |  |  |
| Answered correctly before counseling | 256/280 (91%) | 219/231 (95%) |  | 244/259 (94%) | 214/229 (93%) |
| Changed their answer after counseling | 29/280 (10%) | 23/231 (10%) |  | 13/259 (5%) | 14/229 (6%) |
| Among those who changed their answer: answered correctly after counseling | 15/29 (52%) | 6/23 (26%) |  | 3/13 (23%) | 4/14 (29%) |
| Sweat (F) |  |  |  |  |  |
| Answered correctly before counseling | 268/280 (96%) | 229/231 (99%) |  | 249/259 (96%) | 222/229 (97%) |
| Changed their answer after counseling | 14/280 (5%) | 9/231 (4%) |  | 9/259 (3%) | 8/229 (3%) |
| Among those who changed their answer: answered correctly after counseling | 9/14 (64%) | 1/9 (11%) |  | 3/9 (33%) | 4/8 (50%) |
| Breast milk (True) |  |  |  |  |  |
| Answered correctly before counseling | 129/280 (46%) | 108/231 (47%) |  | 123/259 (47%) | 123/229 (54%) |
| Changed their answer after counseling | 86/280 (31%) | 65/231 (28%) |  | 36/259 (14%) | 42/229 (18%) |
| Among those who changed their answer: answered correctly after counseling | 64/86 (74%) | 53/65 (82%) |  | 25/36 (69%) | 16/42 (38%) |
| Vaginal or rectal fluids (T) |  |  |  |  |  |
| Answered correctly before counseling | 195/280 (70%) | 155/231 (67%) |  | 199/259 (77%) | 155/229 (68%) |
| Changed their answer after counseling | 54/280 (19%) | 41/231 (18%) |  | 35/259 (14%) | 31/229 (14%) |
| Among those who changed their answer: answered correctly after counseling | 40/54 (74%) | 34/41 (83%) |  | 28/35 (80%) | 20/31 (65%) |
| Blood (T) |  |  |  |  |  |
| Answered correctly before counseling | 261/280 (93%) | 219/231 (95%) |  | 247/259 (95%) | 210/229 (92%) |
| Changed their answer after counseling | 16/280 (6%) | 11/231 (5%) |  | 11/259 (4%) | 14/229 (6%) |
| Among those who changed their answer: answered correctly after counseling | 8/16 (50%) | 7/11 (64%) |  | 8/11 (73%) | 8/14 (57%) |
| Semen (T) |  |  |  |  |  |
| Answered correctly before counseling | 243/280 (87%) | 189/231 (82%) |  | 229/259 (88%) | 194/229 (85%) |
| Changed their answer after counseling | 26/280 (9%) | 32/231 (14%) |  | 22/259 (8%) | 18/229 (8%) |
| Among those who changed their answer: answered correctly after counseling | 17/26 (65%) | 22/32 (69%) |  | 13/22 (59%) | 7/18 (39%) |
| Kissing (F) |  |  |  |  |  |
| Answered correctly before counseling | 214/280 (76%) | 196/231 (85%) |  | 199/259 (77%) | 167/229 (73%) |
| Changed their answer after counseling | 54/280 (19%) | 27/231 (12%) |  | 32/259 (12%) | 30/229 (13%) |
| Among those who changed their answer: answered correctly after counseling | 32/54 (59%) | 8/27 (30%) |  | 10/32 (31%) | 16/30 (53%) |
| Mosquito (F) |  |  |  |  |  |
| Answered correctly before counseling | 243/280 (87%) | 203/231 (88%) |  | 228/259 (88%) | 205/229 (90%) |
| Changed their answer after counseling | 25/280 (9%) | 19/231 (8%) |  | 11/259 (4%) | 16/229 (7%) |
| Among those who changed their answer: answered correctly after counseling | 22/25 (88%) | 17/19 (89%) |  | 6/11 (55%) | 11/16 (69%) |
|  |  |  |  |  |  |
|  |  |  |  |  |  |
| **Data in participants who presented for HIV retesting as of January 31, 2019** | **N=80** | **N=30** |  | **N=73** | **N=38** |
|  |  |  |  |  |  |
| Understanding of HIV transmission routes |  |  |  |  |  |
| Urine (False) |  |  |  |  |  |
| Answered correctly at enrolment visit (before counseling) | 75/78 (96%) | 27/29 (93%) |  | 67/71 (94%) | 35/36 (97%) |
| Changed their answer at first retest visit (before counseling) | 4/78 (5%) | 5/29 (17%) |  | 7/71 (10%) | 2/36 (6%) |
| Among those who changed their answer: answered correctly at first retest visit | 2/4 (50%) | 2/5 (40%) |  | 3/7 (43%) | 1/2 (50%) |
| Sweat (F) |  |  |  |  |  |
| Answered correctly at enrolment visit (before counseling) | 77/78 (99%) | 29/29 (100%) |  | 68/71 (96%) | 36/36 (100%) |
| Changed their answer at first retest visit (before counseling) | 3/78 (4%) | 0/29 (0%) |  | 4/71 (6%) | 0/36 (0%) |
| Among those who changed their answer: answered correctly at first retest visit | 1/3 (33%) | - |  | 3/4 (75%) | - |
| Breast milk (True) |  |  |  |  |  |
| Answered correctly at enrolment visit (before counseling) | 37/78 (47%) | 18/29 (62%) |  | 33/71 (46%) | 17/36 (47%) |
| Changed their answer at first retest visit (before counseling) | 23/78 (29%) | 10/29 (34%) |  | 20/71 (28%) | 9/36 (25%) |
| Among those who changed their answer: answered correctly at first retest visit | 16/23 (70%) | 4/10 (40%) |  | 9/20 (45%) | 6/9 (67%) |
| Vaginal or rectal fluids (T) |  |  |  |  |  |
| Answered correctly at enrolment visit (before counseling) | 58/78 (74%) | 25/29 (86%) |  | 62/71 (87%) | 26/36 (72%) |
| Changed their answer at first retest visit (before counseling) | 16/78 (21%) | 7/29 (24%) |  | 10/71 (14%) | 5/36 (14%) |
| Among those who changed their answer: answered correctly at first retest visit | 11/16 (69%) | 3/7 (43%) |  | 5/10 (50%) | 4/5 (80%) |
| Blood (T) |  |  |  |  |  |
| Answered correctly at enrolment visit (before counseling) | 74/78 (95%) | 28/29 (97%) |  | 66/71 (93%) | 30/36 (83%) |
| Changed their answer at first retest visit (before counseling) | 10/78 (13%) | 2/29 (7%) |  | 10/71 (14%) | 3/36 (8%) |
| Among those who changed their answer: answered correctly at first retest visit | 4/10 (40%) | 1/2 (50%) |  | 4/10 (40%) | 2/3 (67%) |
| Semen (T) |  |  |  |  |  |
| Answered correctly at enrolment visit (before counseling) | 66/78 (85%) | 28/29 (97%) |  | 66/71 (93%) | 35/36 (97%) |
| Changed their answer at first retest visit (before counseling) | 6/78 (8%) | 1/29 (3%) |  | 3/71 (4%) | 1/36 (3%) |
| Among those who changed their answer: answered correctly at first retest visit | 3/6 (50%) | 1/1 (100%) |  | 1/3 (33%) | 1/1 (100%) |
| Kissing (F) |  |  |  |  |  |
| Answered correctly at enrolment visit (before counseling) | 61/78 (78%) | 24/29 (83%) |  | 54/71 (76%) | 24/36 (67%) |
| Changed their answer at first retest visit (before counseling) | 15/78 (19%) | 8/29 (28%) |  | 16/71 (23%) | 8/36 (22%) |
| Among those who changed their answer: answered correctly at first retest visit | 8/15 (53%) | 2/8 (25%) |  | 10/16 (63%) | 4/8 (50%) |
| Mosquito (F) |  |  |  |  |  |
| Answered correctly at enrolment visit (before counseling) | 66/78 (85%) | 24/29 (83%) |  | 63/71 (89%) | 32/36 (89%) |
| Changed their answer at first retest visit (before counseling) | 11/78 (14%) | 6/29 (21%) |  | 9/71 (13%) | 4/36 (11%) |
| Among those who changed their answer: answered correctly at first retest visit | 5/11 (45%) | 5/6 (83%) |  | 7/9 (78%) | 0/4 (0%) |
|  |  |  |  |  |  |
|  |  |  |  |  |  |
| Change in HIV knowledge score between enrolment and first retest visit |  |  |  |  |  |
| HIV knowledge score at enrolment visit (possible range: 0 to 18) | 12 (9 to 15) | 12 (9 to 15) |  | 13 (11 to 15) | 11 (8 to 13) |
| Change in HIV knowledge score between enrolment and first retest visit | +1 (-1 to +2) (n=79) | +1 (-1 to +2) (n=29) |  | +1 (-1 to +3) | 1 (-1 to +2) |
|  |  |  |  |  |  |
| Change in self-reported recent sexual risk of HIV infection between enrolment and first retest visit |  |  |  |  |  |
| Inconsistent condom use in last 3 months |  |  |  |  |  |
| Answered “no” at enrolment visit | 39/75 (52%) | 6/28 (21%) |  | 36/69 (52%) | 12/36 (33%) |
| Changed their answer at first retest visit | 24/75 (32%) | 7/28 (25%) |  | 24/69 (35%) | 17/36 (47%) |
| Among those who changed their answer: answered “no” at first retest visit | 16/24 (67%) | 5/7 (71%) |  | 17/24 (71%) | 10/17 (59%) |
| ≥2 sexual partners in last 3 months |  |  |  |  |  |
| Answered “no” at enrolment visit | 20/76 (26%) | 11/29 (38%) |  | 22/73 (30%) | 18/36 (50%) |
| Changed their answer at first retest visit | 28/76 (37%) | 7/29 (24%) |  | 24/73 (33%) | 11/36 (31%) |
| Among those who changed their answer: answered “no” at first retest visit | 20/28 (71%) | 6/7 (86%) |  | 16/24 (67%) | 6/11 (55%) |
| STI symptoms |  |  |  |  |  |
| Answered “no” at enrolment visit | 66/66 (100%) | 21/24 (88%) |  | 66/67 (99%) | 30/33 (91%) |
| Changed their answer at first retest visit | 3/66 (5%) | 3/24 (13%) |  | 3/67 (5%) | 7/33 (21%) |
| Among those who changed their answer: answered “no” at first retest visit | 0/3 (0%) | 2/3 (67%) |  | 1/3 (33%) | 3/7 (43%) |
|  |  |  |  |  |  |
